# Supplementary material for: New Insights into Microbial Diversity of the Traditional Packed Table Olives Aloreña de Málaga through Metataxonomic Analysis
Source: Microorganisms. 2021 Mar 9;9(3):561. doi: 10.3390/microorganisms9030561 (PMC8000080; doi:10.3390/microorganisms9030561)
Supplement: Supplementary file 1 [file microorganisms-09-00561-s001.xlsx]

## Sheet: Table S1
Table S1. Alpha diversity indexes for bacteria (16S) and fungi (ITS) populations obtained from packed traditional Aloreña de Málaga table olives
Bacteria population
Time	Matrix	Sample	Observed	FaithPD	Shannon	Simpson	Clonality
T0	Brine	B.0a	43.00	1.34	2.12	0.80	0.95
T0	Brine	B.2a	40.00	1.33	2.15	0.81	0.95
T0	Fruit	F.0a	44.00	1.19	1.91	0.73	0.96
T1	Brine	B.0b	40.00	1.33	2.12	0.80	0.95
T1	Brine	B.2b	39.00	0.90	2.00	0.76	0.95
T1	Fruit	F.0b	43.00	1.35	2.06	0.78	0.95
T1	Fruit	F.2a	42.00	1.41	2.18	0.81	0.95
T2	Brine	B.1a	52.00	1.44	2.23	0.81	0.96
T2	Brine	B.3a	43.00	1.34	2.16	0.81	0.95
T2	Fruit	F.1a	44.00	1.27	2.24	0.82	0.95
T2	Fruit	F.3a	41.00	1.40	2.18	0.81	0.95
T3	Brine	B.1b	41.00	1.03	2.15	0.80	0.95
T3	Brine	B.3b	41.00	1.10	1.96	0.69	0.95
T3	Fruit	F.1b	71.00	0.84	2.51	0.83	0.97
T3	Fruit	F.3b	37.00	0.95	1.40	0.50	0.96
Fungi population
	Matrix	Sample	Observed	FaithPD	Shannon	Simpson	Clonality
T0	Brine	B.0a	37.00	2.04	2.13	0.73	0.94
T0	Brine	B.2a	35.00	2.03	2.13	0.73	0.94
T0	Fruit	F.0a	37.00	2.23	1.99	0.65	0.95
T1	Brine	B.0b	33.00	1.99	2.00	0.70	0.94
T1	Brine	B.2b	36.00	2.04	2.07	0.71	0.94
T1	Fruit	F.0b	35.00	2.01	1.99	0.69	0.94
T1	Fruit	F.2a	33.00	2.01	1.95	0.68	0.94
T2	Brine	B.1a	32.00	1.99	2.06	0.72	0.94
T2	Brine	B.3a	30.00	1.97	1.96	0.68	0.94
T2	Fruit	F.1a	33.00	1.98	1.88	0.64	0.94
T2	Fruit	F.3a	38.00	2.33	2.22	0.76	0.94
T3	Brine	B.1b	34.00	2.02	2.06	0.71	0.94
T3	Brine	B.3b	32.00	1.62	2.19	0.74	0.93
T3	Fruit	F.3b	30.00	1.97	2.63	0.89	0.91

## Sheet: Table S2
Genus/Sample	B.0a	B.0b	B.1a	B.1b	B.2a	B.2b	B.3a	B.3b	F.0a	F.0b	F.1a	F.1b	F.2a	F.3a	F.3b
Lactiplantibacillus	56.96	62.53	57.61	66.19	59.57	71.12	63.33	83.10	39.03	47.55	63.55	47.42	64.69	62.33	86.33
Pediococcus	36.26	29.50	35.09	26.35	32.80	22.64	28.97	13.73	7.32	46.43	22.54	47.50	27.83	29.53	9.29
Celerinatantimonas	4.34	5.60	4.88	5.19	5.19	4.49	5.26	2.17	52.26	3.91	12.02	3.51	5.22	5.23	0.60
Unassigned taxa	0.27	0.22	0.23	0.00	0.19	0.00	0.14	0.29	0.18	0.12	0.22	0.00	0.15	0.19	0.14
Salinicola	0.18	0.18	0.18	0.17	0.15	0.00	0.19	0.14	0.00	0.13	0.19	0.00	0.16	0.23	0.00
Alkalibacterium	0.17	0.00	0.00	0.00	0.17	0.00	0.00	0.00	0.00	0.00	0.00	0.00	0.00	0.00	0.00
Marinilactibacillus	0.00	0.15	0.16	0.15	0.00	0.12	0.00	0.00	0.00	0.17	0.14	0.11	0.15	0.19	0.00
Bacillaceae family	0.00	0.00	0.00	0.00	0.00	0.00	0.23	0.00	0.00	0.00	0.00	0.00	0.00	0.00	0.00
Enterobacter	0.00	0.00	0.00	0.00	0.00	0.00	0.00	0.00	0.36	0.00	0.00	0.00	0.00	0.00	0.00
Pseudomonas	0.00	0.00	0.00	0.00	0.00	0.00	0.00	0.00	0.24	0.00	0.00	0.00	0.00	0.00	0.00
Suttonella	0.00	0.00	0.12	0.15	0.00	0.00	0.00	0.00	0.00	0.00	0.17	0.00	0.10	0.17	0.00
Carnimonas	0.00	0.00	0.00	0.00	0.00	0.00	0.00	0.00	0.21	0.00	0.00	0.00	0.00	0.00	0.00
Lactobacillaceae family	0.00	0.00	0.00	0.00	0.00	0.00	0.00	0.00	0.00	0.15	0.00	0.00	0.00	0.00	0.00
*A total of 16 samples were initially analyzed for each microbial group (n=32). However, for the metataxonomic analysis, 2 samples of the ITS, and 1 of the 16S regions failed the quality control in the bioinformatics analysis, being finally excluded from the study.

## Sheet: Table S3
Genus/Sample	B.0a	B.0b	B.1a	B.1b	B.2a	B.2b	B.3a	B.3b	F.0a	F.0b	F.1a	F.2a	F.3a	F.3b
Citeromyces	53.35	56.73	54.45	55.04	53.91	56.19	57.64	52.86	64.78	57.63	63.21	58.27	50.56	19.29
Unassigned taxa	26.34	25.35	26.79	26.94	28.14	28.78	25.48	42.11	23.92	24.81	21.77	23.25	26.51	32.08
Candida	10.85	9.88	10.20	10.00	9.77	8.46	9.64	2.72	5.13	10.12	8.22	10.21	12.12	29.26
Penicillium	8.50	7.24	7.68	7.27	7.28	5.89	6.46	2.31	5.22	6.53	6.09	7.47	9.44	17.05
Wickerhamomyces	0.56	0.43	0.50	0.37	0.48	0.34	0.42	0.00	0.19	0.53	0.31	0.44	0.60	1.86
Aureobasidium	0.21	0.21	0.21	0.23	0.24	0.18	0.20	0.00	0.23	0.21	0.24	0.23	0.32	0.00
Debaryomyces	0.19	0.15	0.16	0.15	0.17	0.15	0.16	0.00	0.36	0.17	0.17	0.14	0.20	0.46
Cladosporium	0.00	0.00	0.00	0.00	0.00	0.00	0.00	0.00	0.00	0.00	0.00	0.00	0.26	0.00
Acremonium	0.00	0.00	0.00	0.00	0.00	0.00	0.00	0.00	0.16	0.00	0.00	0.00	0.00	0.00
*A total of 16 samples were initially analyzed for each microbial group (n=32). However, for the metataxonomic analysis, 2 samples of the ITS, and 1 of the 16S regions failed the quality control in the bioinformatics analysis, being finally excluded from the study.
